# Supplementary material for: Photochromic thermoplastics doped with nanostructured tungsten trioxide
Source: Royal Society of Chemistry journal article supplement (doi:10.1039/c8nj01531g), 2018-01-01
Supplement: c8nj01531g1.pdf [file c8nj01531g1.pdf]

## Photochromic Thermoplastics Doped with Nanostructured Tungsten Trioxide

Naixu Li,<sup>a</sup> Mengmeng Huo,<sup>a</sup> Min Li,<sup>a</sup> Tuoqi Li,<sup>b</sup> Jiancheng Zhou,<sup>a\*</sup> Jiuyang Zhang<sup>a\*</sup>

<sup>a</sup> Department of Chemistry and Chemical Engineering, Southeast University, 211189, Nanjing, PR China;

<sup>b</sup> The Dow Chemical Company, 2301 N. Brazosport Blvd, B-1608, Freeport, TX USA 77541

### Supporting Information

#### Experimental Details:

##### Materials

Sodium tungstate dehydrate ( $\text{NaWO}_4 \cdot 2\text{H}_2\text{O}$ ) was provided by the Shanghai Chemical Reagent Company. Dimethylformamide (DMF) (99.5%) was purchased from Sinopharm Chemical Reagent Co., Ltd. Nitric acid (65%) was supplied by the Shanghai Chemical Reagent Company. Cupric bromide (99.95%) and Copper (AR,99.5%) were provided by the Aladdin Industrial Corporation. *N,N,N',N'',N''*-Pentamethyldiethylenetriamine (PMDETA) (>98.0%) and 2-Bromoisobutyric acid ethyl ester (>98.0%) were purchased from the TCI (Shanghai) Development Co.,Ltd. Butyl acrylate (BA) (99%, Aladdin) and methyl methacrylate (MMA) (99.0%, Aladdin) were purified through alumina oxide columns before using. All other reagents were used as received without further purification.

##### Instrumentation

**Gel Permeation Chromatography (GPC)** The PL-GPC 220 (Polymer Laboratories) was used to measure samples. These samples were performed on a at 40 °C in THF. Polystyrene (PS) was used as the calibration standard. The detection was operated with a low rate of 1 mL/min.

**<sup>1</sup>H NMR** The test was performed on a Bruker Av400III HD instrument at 400 MHz, Chloroform-D as the solvent for <sup>1</sup>H NMR measurement.

**Ultraviolet-visible Light Detector (UV)** Samples were prepared through the melt-compounding approach by a circular mold. The diameter and the thickness of the specimens were 25 mm and 1 mm respectively. Then, these samples were irradiated under ultraviolet lamp whose power was 500 W and wave length range was 350~450 nm, for a certain time interval. A Shimadzu Autograph UV-2450 with the wavelength range from 200 to 800 nm was used to collect UV-vis diffusion reflectance spectrum.

**Solid Mechanical Property Experiments** Samples were prepared by melt-compounding at 150 °C to form uniform dog-bone shaped specimens (length: ~38 mm, width: ~15 mm, thickness: ~0.5 mm) following ASTM standard D1708. The SANS E42.503 tensile tester was used to measure uniaxial tensile tests with a displacement-speed control of 5.0 mm/min at room temperature. The reported results for tensile properties represented an average over at least three independent measurements on three identical specimens for each polymer sample.

**Scanning electron microscopy (SEM)** Samples for SEM were thin films with 1 mm in thickness, which were prepared through melt-compounding approach, and then cryofractured in liquid nitrogen. The cross-sectional morphologies of the as-prepared films were observed under a Zeiss Ultra Plus microscope.

**Transmission electron microscopy (TEM)** The size and morphology of WO<sub>3</sub> were measured by transmission electron microscopy (TEM, Hitachi H-600, FEI Tecnai G2 F30).

**Differential Scanning Calorimetry (DSC)** Thermal transitions were determined by a SDT-Q600 thermal analyzer (TA). Samples (5~10 mg) were loaded into hermetically-sealed aluminum pans. They were first heated to 150 °C at a rate of 30 °C/min and held at 150 °C to erase any thermal history, then quenched to -40 °C, and reheated to 150 °C at a rate of 10 °C/min. Glass transition temperatures were determined during the second heating run.

**Thermogravimetric Analysis (TGA)** Thermogravimetric analysis was accomplished by a SDT-Q600 instrument. The samples (3 - 5 mg) were loaded into open aluminum pans and then were heated to 800 °C at a rate of 10 °C/min from room temperature in the air atmosphere.

## Experimental

**Preparation and surface modification of WO<sub>3</sub> Nanosheets.** The prior art has provided a hydrothermal method to prepare WO<sub>3</sub> nanosheets.<sup>1</sup> Specifically, 7 mL of nitric acid was added in 30 mL of water and Stirred the mixture for 10 min. 2 g of NaWO<sub>4</sub> · 2H<sub>2</sub>O was dissolved in 30 mL of water with ultrasonic treatment for 5 min, and then the solution was slowly added to the prepared nitric acid solution, and immediately light yellow precipitates appeared. The suspension was stirred for 30 min and then hydrothermally treated at 180 °C for 3 h. After being cooled to room temperature, the yellow product was centrifuged. The product was washed for four times with distilled water and dried in a vacuum oven overnight. SEM and TEM images of the WO<sub>3</sub> nanosheets was shown in Figure 2A and Figure S1(A). Finally, the generated WO<sub>3</sub> nanosheets were calcined at 600 °C in air at a heating rate of 5 °C per minute.

**Preparation and surface modification of WO<sub>3</sub> Nanorods.** A hydrothermal method to prepare WO<sub>3</sub> nanorods was provided by the prior literature.<sup>2</sup> Firstly, 1.5 g of NaWO<sub>4</sub> · 2H<sub>2</sub>O and 0.2 g of NaCl were dissolved in 40 mL of water with ultrasonic treatment for 5 min. 1.2 mol/L HNO<sub>3</sub> was added dropwise into the above solution until light yellow precipitates was formed, which consumed about 7 ml of 1.2 mol/l HNO<sub>3</sub> during the while process. The suspension was stirred for 30 min and then hydrothermally treated at 180 °C for 12 h. The yellow product was centrifuged after being cooled to room temperature. The product was washed for four times with distilled water and dried in a vacuum oven overnight. SEM and TEM images of the WO<sub>3</sub> nanofibers was shown in Figure S2(A) and Figure S2(B). Finally, the generated WO<sub>3</sub> nanofibers were calcined at 600 °C in air at a heating rate of 5 °C per minute.

**Synthesis of random copolymer P(MMA-*co*-PBA).** P(MMA-*co*-BA) was prepared by adding MMA (15 g, 150 mmol), BA (12.8 g, 14.4 mL, 100 mmol) and 2-Bromoisobutyric acid ethyl ester(9.5 mg, 0.05 mmol) into a Schlenk flask with DMF(15 mL) as the solvent. The catalyst Cu(II)Br<sub>2</sub> (6.5 mg, 0.029 mmol) and ligand PMDETA (25.2 mg, 0.145 mmol) were added. Subsequently, three fresh copper wires

(20 mm in length) were introduced into the flask. After the solution was degassed by three freeze–pump–thaw cycles and backfilled with nitrogen, the solution was placed in a water bath at 70 °C and stirred for 4.5 h. To stop the copolymerization, the flask was opened to contact with air and rapidly cooled in liquid nitrogen. The product was collected by sedimentation in excessive cold methanol for three times and drying under vacuum at 40 °C for two hours to obtain transparent solids. Yield: 12.3g, 44.2%. <sup>1</sup>H NMR (Chloroform-D, δ, ppm) (Figure 1B): 4.0 (-COOCH<sub>2</sub>-, 2H), 3.6 (-COOCH<sub>3</sub>, 3H), 1.8 (-OCH<sub>2</sub>CH<sub>2</sub>-, 2H), 1.4 (-CH<sub>2</sub>CH<sub>2</sub> CH<sub>3</sub>, 2H). GPC curve was shown in Figure 1C.

**Preparation of the WO<sub>3</sub>/P(MMA-co-BA) nanocomposites.** A series of WO<sub>3</sub>/P(MMA-co-BA) nanocomposites were prepared in the same procedure, but with different weight percentages and types of WO<sub>3</sub>. For example, WO<sub>3</sub>-Sheet(0.5) and WO<sub>3</sub>-Sheet-C(0.5) was prepared by adding 6mg pristine WO<sub>3</sub> nanosheets and 6mg calcined WO<sub>3</sub> nanosheets into 5mL acetone with ultrasonic treatment for 30 min, respectively. Then 1.2 g of random copolymer P(MMA-co-BA) was added into the above solution and subsequently stirred for 24 h. Finally, the mixture was transferred to a Teflon mold and the solvent was allowed to evaporate for 24 h under ambient conditions. The sample was further dried at 45 °C for 4 hours in a vacuum oven.

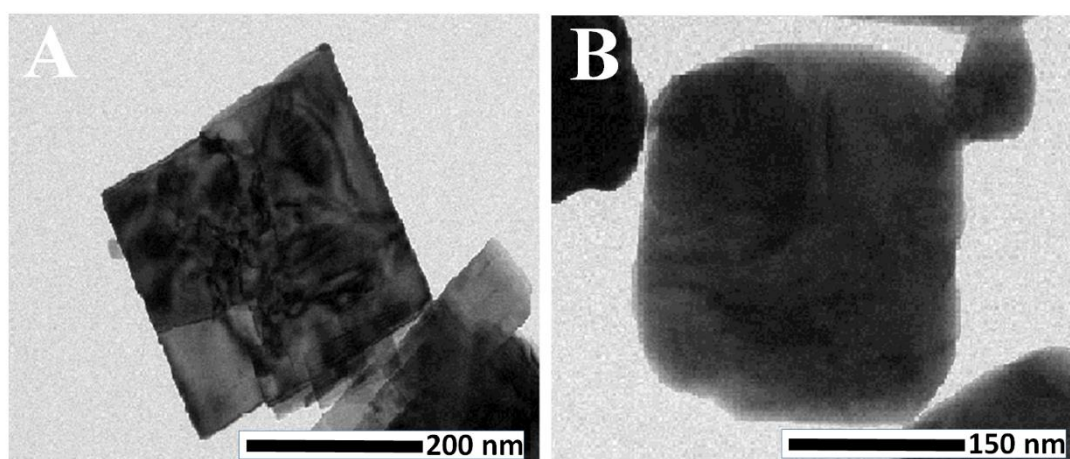

**Figure S1.** Representative TEM image of (A) pristine WO<sub>3</sub> nanosheets and (B) calcined WO<sub>3</sub> nanosheets.

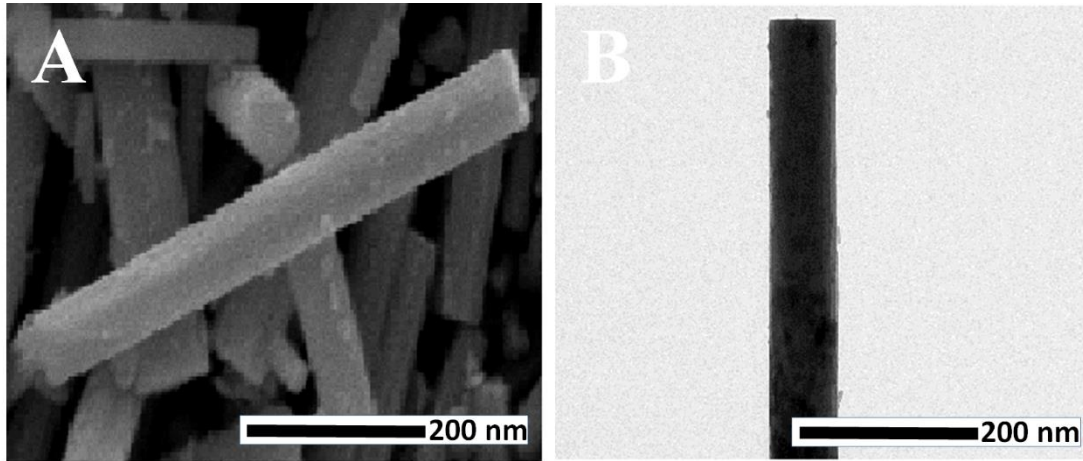

**Figure S2.** Representative (A) SEM and (B) TEM image of pristine  $\text{WO}_3$  nanorods before any further treatment.

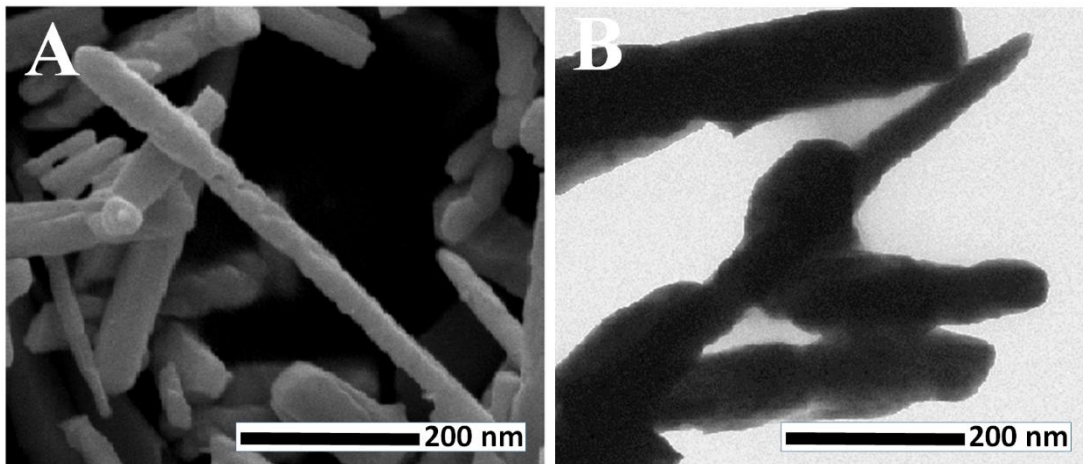

**Figure S3.** Representative (A) SEM and (B) TEM image of calcined  $\text{WO}_3$  nanorods.

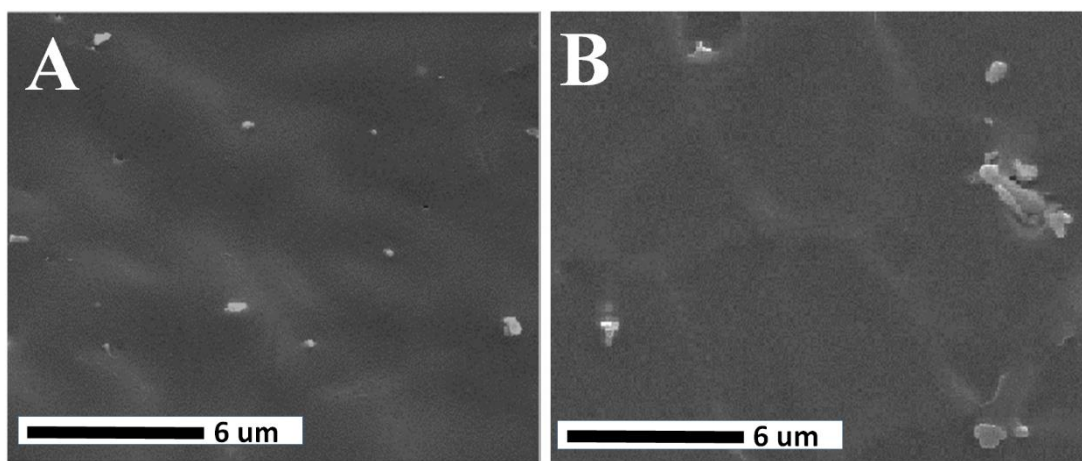

**Figure S4.** Representative SEM image (cross-section of the sample) of (A) the blends of pristine  $\text{WO}_3$  nanorods and the random polymer, P(MMA-*co*-BA); and (B) calcined  $\text{WO}_3$  nanorods and P(MMA-*co*-BA). The weight percentage of  $\text{WO}_3$  was controlled at 1.5%. The weight percentage of  $\text{WO}_3$  in both samples was controlled at

1.5%.

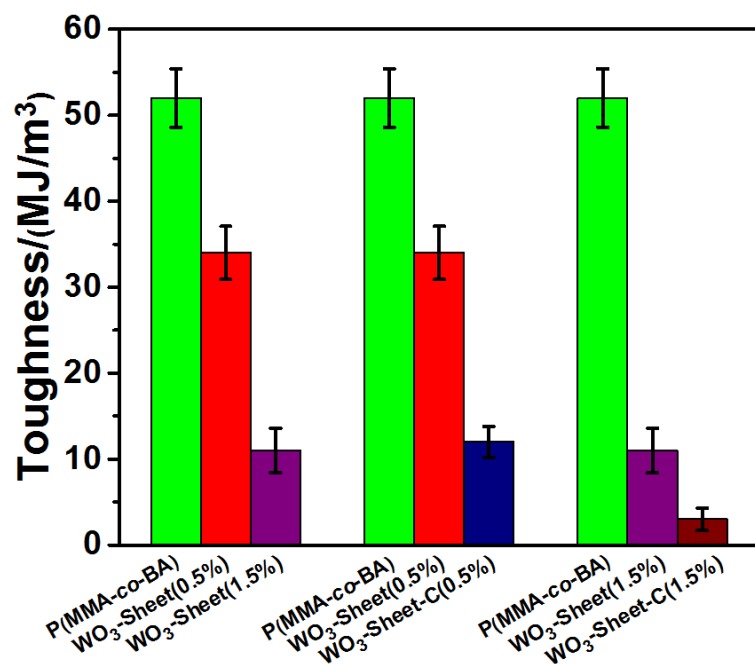

Figure S5. Tensile toughness of WO<sub>3</sub> nanosheets/ P(MMA-co-BA) nanocomposites.

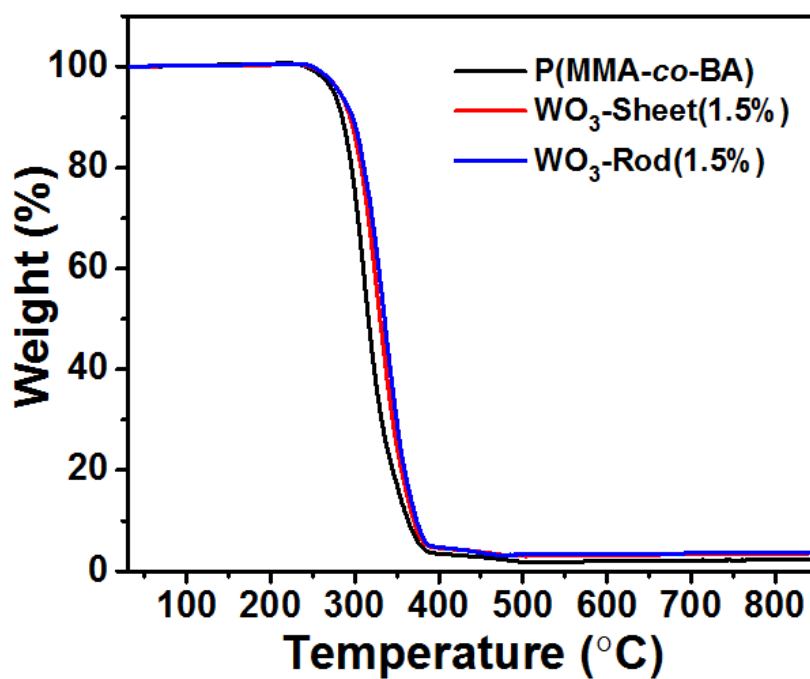

Figure S6. Thermogravimetric analysis (TGA) in air flow for P(MMA-co-BA), WO<sub>3</sub>-Sheet(1.5%) and WO<sub>3</sub>-Rod(1.5%).

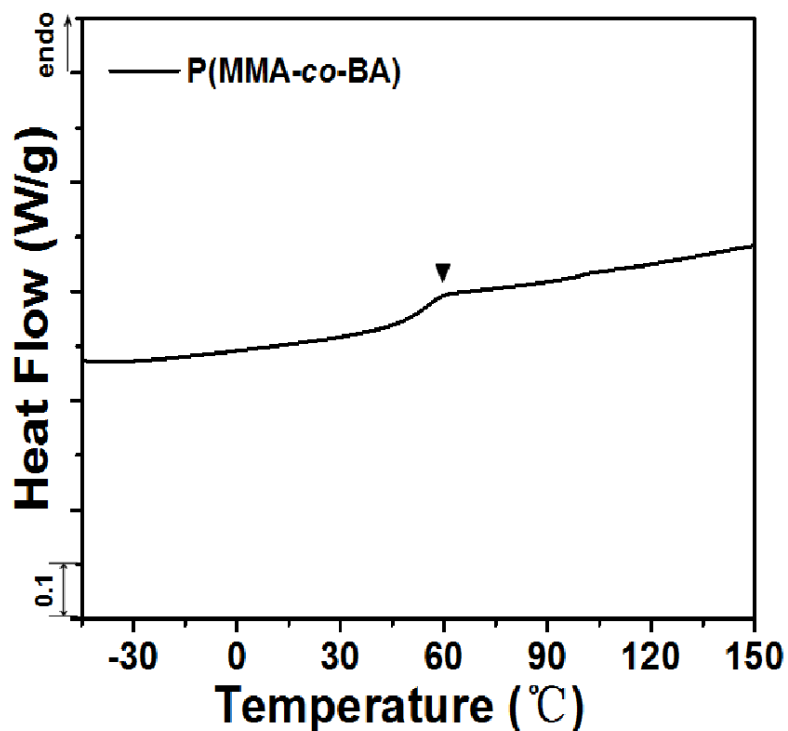

**Figure S7.** Differential scanning calorimetry (DSC) curves of P(MMA-co-BA). Arrow indicates the glass transition temperature.

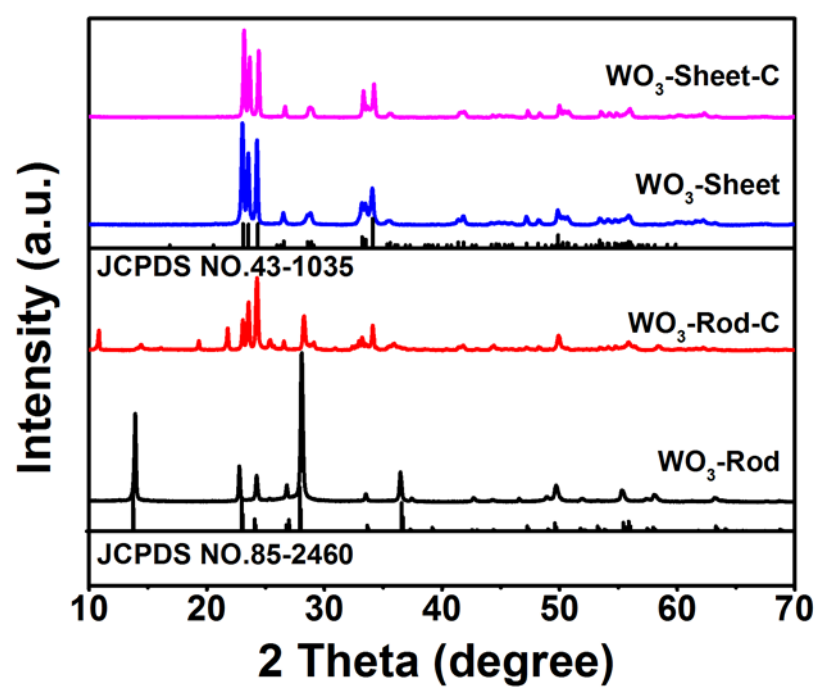

**Figure S8.** The X-ray diffraction (XRD) spectra of WO<sub>3</sub>-Rod, WO<sub>3</sub>-Rod-C, WO<sub>3</sub>-Sheet and WO<sub>3</sub>-Sheet-C. Pattern WO<sub>3</sub>-Rod and WO<sub>3</sub>-Sheet include the calculated diffraction lines from the corresponding JCPDS databases 43-1035 and 85-2460.

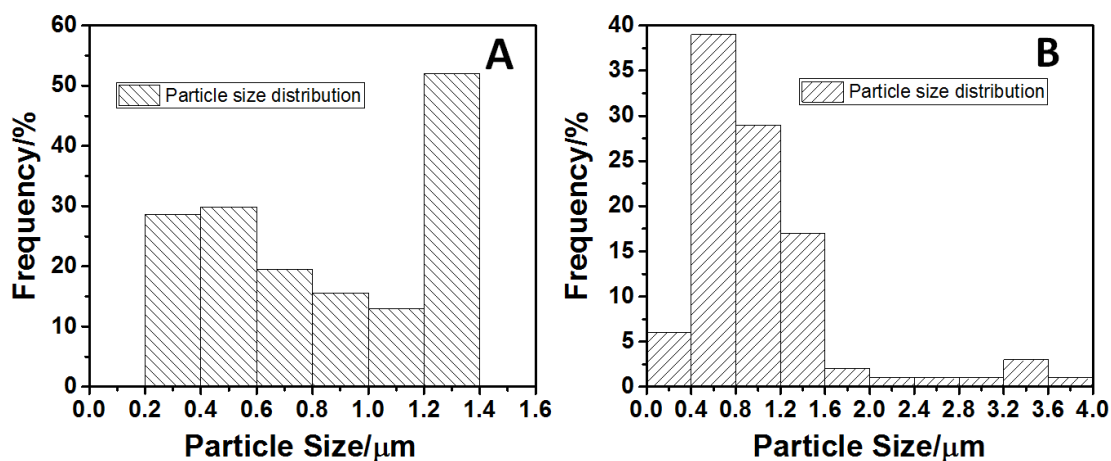

**Figure S9.** (A) The particle size distribution of embedded pristine WO<sub>3</sub> nanosheets. (B) The particle size distribution of embedded calcined WO<sub>3</sub> nanosheets. The weight percentage of WO<sub>3</sub> nanosheets in both samples was maintained at 1.5%.

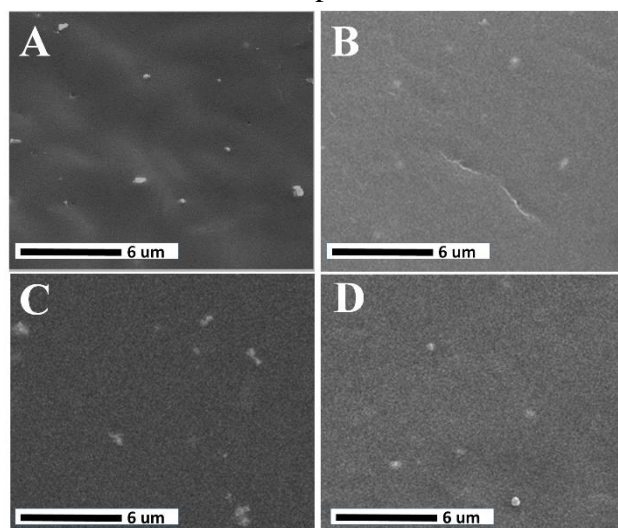

**Figure S10.** Representative SEM images for (A) WO<sub>3</sub>-Sheet(1.5%) and (B) WO<sub>3</sub>-Sheet(0.5%)(cross-section); (C) WO<sub>3</sub>-Sheet (1.5%) and (D) WO<sub>3</sub>-Sheet (0.5%) (surface).

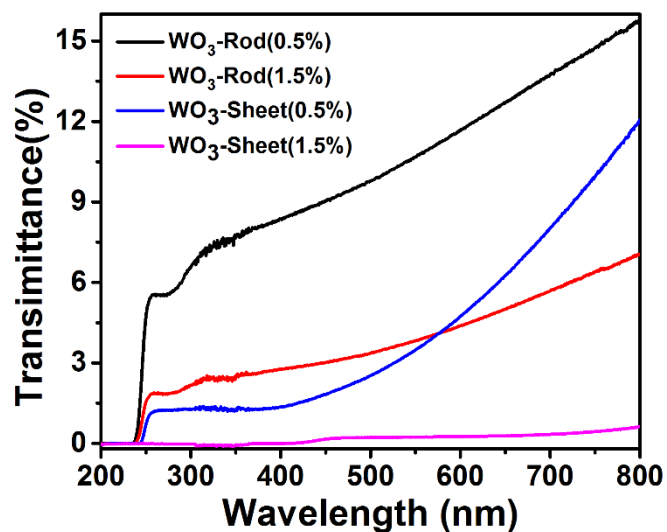

**Figure S11.** The intensity of transmission for WO<sub>3</sub>-Rod(0.5%), WO<sub>3</sub>-Rod(1.5%), WO<sub>3</sub>-Sheet(0.5%), and WO<sub>3</sub>-Sheet(1.5%).



WO<sub>3</sub>-Sheet(1.5%) and WO<sub>3</sub>-Sheet(0.5%).

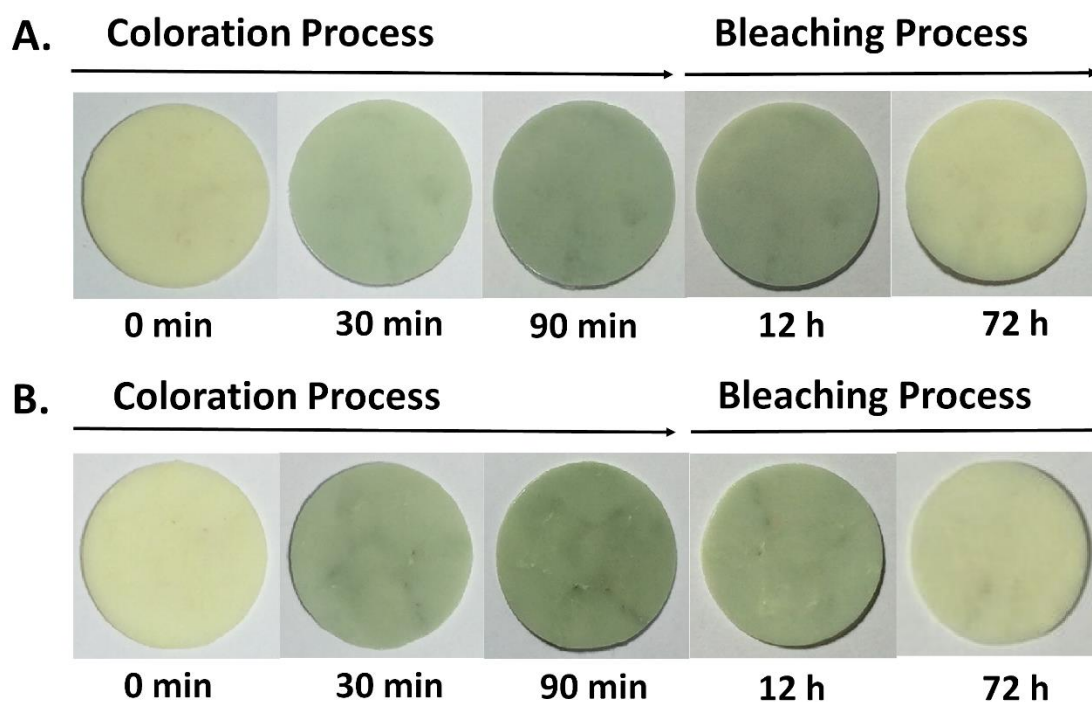

**Figure S12.** (A) Photos of WO<sub>3</sub>-Sheet(0.5%) during the coloration process after different exposure time to UV radiation and bleaching process after different recovery time at room temperature (25 °C) in air. The first one on the left corresponds to 0 min of exposure, while the third one in the middle is for 90 min, and the last one on the right corresponds to recovery after 72 h. (B) Photos of WO<sub>3</sub>-Sheet-C(0.5%) during the coloration process after different exposure time to UV radiation and bleaching process after different recovery time at room temperature (25 °C) in air. The first one on the left corresponds to 0 min of exposure, while the third one in the middle is for 90 min, and the last one on the right corresponds to recovery after 72 h.

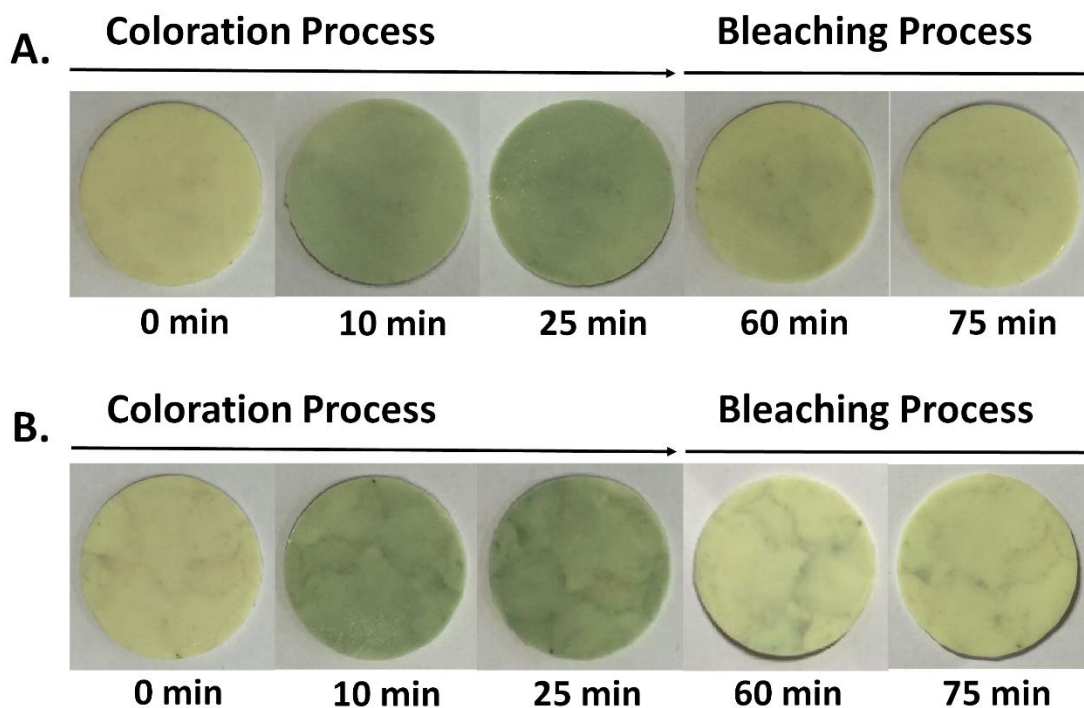

**Figure S13.** (A)Photos of  $\text{WO}_3$ -Sheet(1.5%) during the coloration process after different exposure time to UV radiation and bleaching process after different recovery time at room temperature (25 °C) in air. The first one on the left corresponds to 0 min of exposure, while the third one in the middle is for 25 min, and the last one on the right corresponds to recovery after 75 min. (B)Photos of  $\text{WO}_3$ -Sheet-C(1.5%) during the coloration process after different exposure time to UV radiation and bleaching process after different recovery time at room temperature (25 °C) in air. The first one on the left corresponds to 0 min of exposure, while the third one in the middle is for 25 min, and the last one on the right corresponds to recovery after 75 min.

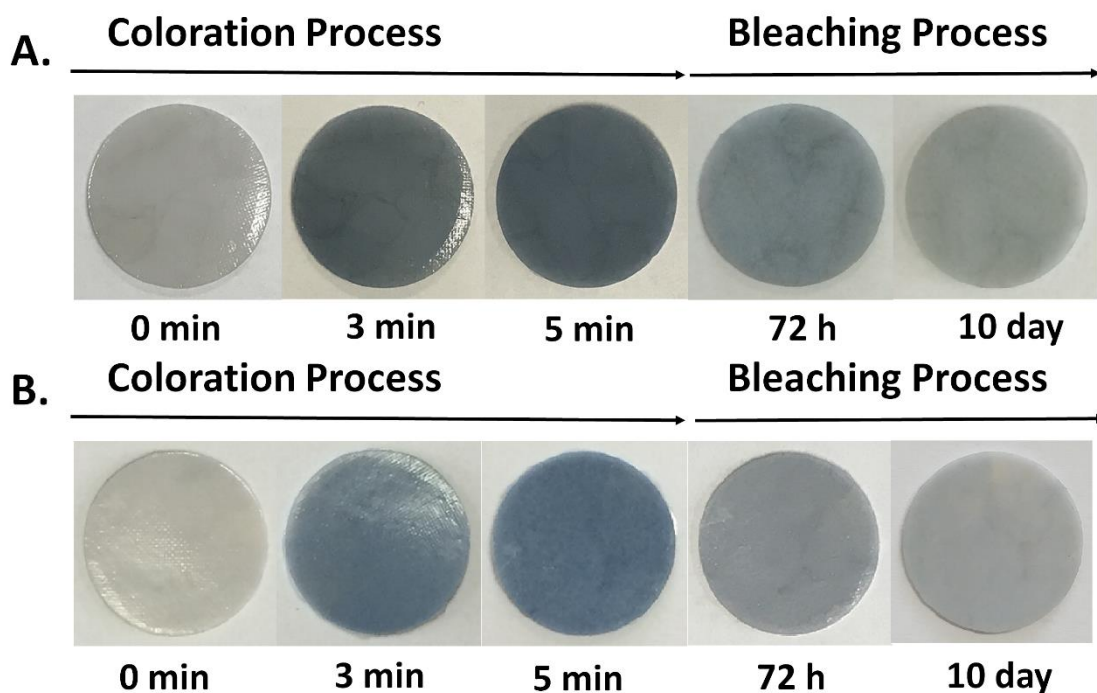

**Figure S14.** (A) Photos of  $\text{WO}_3\text{-Rod}(0.5\%)$  during the coloration process after different exposure time to UV radiation and bleaching process after different recovery time at room temperature ( $25\text{ }^\circ\text{C}$ ) in air. The first one on the left corresponds to 0 min of exposure, while the third one in the middle is for 5 min, and the last one on the right corresponds to recovery after 10 day. (B) Photos of  $\text{WO}_3\text{-Rod}(1.5\%)$  during the coloration process after different exposure time to UV radiation and bleaching process after different recovery time at room temperature ( $25\text{ }^\circ\text{C}$ ) in air. The first one on the left corresponds to 0 min of exposure, while the third one in the middle is for 5 min, and the last one on the right corresponds to recovery after 10 day.

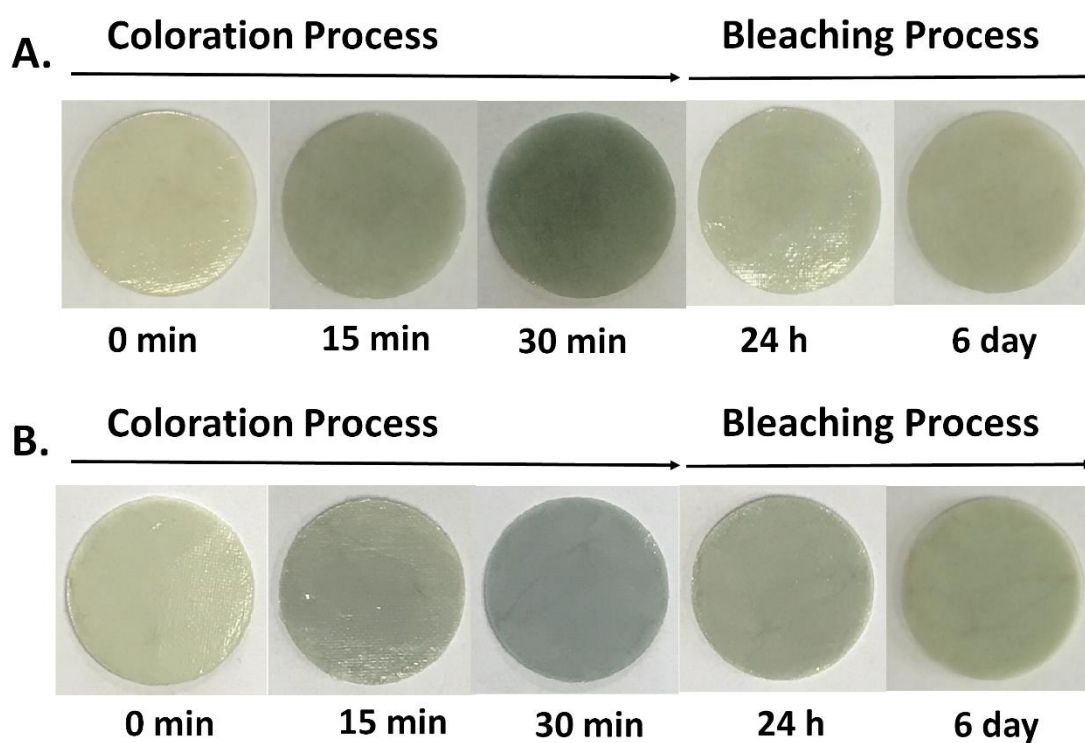

**Figure S15.** (A) Photos of  $\text{WO}_3\text{-Rod-C}(0.5\%)$  during the coloration process after different exposure time to UV radiation and bleaching process after different recovery time at room temperature ( $25\text{ }^\circ\text{C}$ ) in air. The first one on the left corresponds to 0 min of exposure, while the third one in the middle is for 30 min, and the last one on the right corresponds to recovery after 6 day. (B) Photos of  $\text{WO}_3\text{-Rod-C}(1.5\%)$  during the coloration process after different exposure time to UV radiation and bleaching process after different recovery time at room temperature ( $25\text{ }^\circ\text{C}$ ) in air. The first one on the left corresponds to 0 min of exposure, while the third one in the middle is for 30 min, and the last one on the right corresponds to recovery after 6 day.

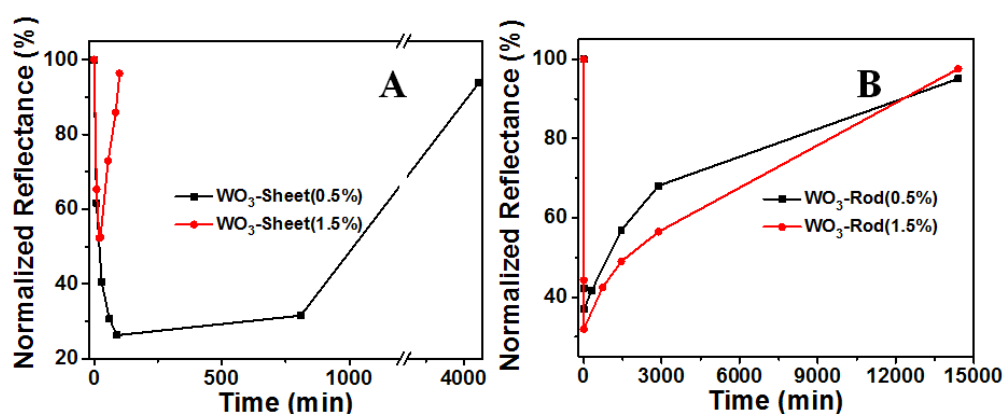

**Figure S16.** The effect of different contents of pristine WO<sub>3</sub> nanosheets and nanorods on the photochromic properties of WO<sub>3</sub>/P(MMA-*co*-BA) nanocomposites. The intensity of reflectance for (A) WO<sub>3</sub>-Sheet(0.5%) and WO<sub>3</sub>-Sheet(1.5%); (B) WO<sub>3</sub>-Rod(0.5%) and WO<sub>3</sub>-Rod(1.5%) at 800 nm wavelength during the coloration and bleaching processes.

**Table S1.** Tensile properties of nanocomposites of WO<sub>3</sub> and P(MMA-*co*-BA) copolymer.

| Samples                        | $\sigma_y$<br>(MPa) | $E^a$<br>(MPa) | $\epsilon_b$<br>(%) | Toughness <sup>b</sup><br>(MJ/m <sup>3</sup> ) |
|--------------------------------|---------------------|----------------|---------------------|------------------------------------------------|
| P(MMA- <i>co</i> -BA)          | 30.5 ± 1.5          | 356.1 ± 59.7   | 190 ± 15            | 52                                             |
| WO <sub>3</sub> -Rod(0.5%)     | 33 ± 3.7            | 390 ± 61.1     | 187 ± 13            | 63                                             |
| WO <sub>3</sub> -Rod(1.5%)     | 30.8 ± 1.4          | 379.9 ± 21     | 127 ± 15            | 44                                             |
| WO <sub>3</sub> -Rod-C(0.5%)   | 27.5 ± 1.4          | 334.6 ± 4.9    | 126 ± 15            | 40                                             |
| WO <sub>3</sub> -Rod-C(1.5%)   | 27.5 ± 1.1          | 368.7 ± 55.6   | 71 ± 1              | 21                                             |
| WO <sub>3</sub> -Sheet(0.5%)   | 28.8 ± 0.7          | 323.3 ± 5.3    | 105 ± 6             | 34                                             |
| WO <sub>3</sub> -Sheet(1.5%)   | 23.5 ± 2.0          | 342.2 ± 66.7   | 41 ± 2              | 11                                             |
| WO <sub>3</sub> -Sheet-C(0.5%) | 23.8 ± 0.7          | 331.3 ± 16.4   | 40 ± 6              | 12                                             |
| WO <sub>3</sub> -Sheet-C(1.5%) | 40.2 ± 1.1          | 367.3 ± 82.0   | 15 ± 4              | 3                                              |

<sup>a</sup> Room temperature Young's modulus ( $E$ ) determined from the slope of the fitting line to the linear elastic regime of stress-strain curves. <sup>b</sup> Tensile toughness determined by integrating the area under stress-strain curves up to the specimen breaking point.

**Table S2.** Summarized coloration and bleaching time of WO<sub>3</sub>/P(MMA-co-BA) nanocomposites.

| <b>Samples</b>                      | <b>Coloration process</b> | <b>Bleaching process</b> |
|-------------------------------------|---------------------------|--------------------------|
| <b>WO<sub>3</sub>-Rod(0.5%)</b>     | 5 min                     | 10 day                   |
| <b>WO<sub>3</sub>-Rod(1.5%)</b>     | 5 min                     | 10 day                   |
| <b>WO<sub>3</sub>-Rod-C(0.5%)</b>   | 30 min                    | 6 day                    |
| <b>WO<sub>3</sub>-Rod-C(1.5%)</b>   | 30 min                    | 6 day                    |
| <b>WO<sub>3</sub>-Sheet(0.5%)</b>   | 90 min                    | 72 h                     |
| <b>WO<sub>3</sub>-Sheet(1.5%)</b>   | 25 min                    | 75 min                   |
| <b>WO<sub>3</sub>-Sheet-C(0.5%)</b> | 90 min                    | 72 h                     |
| <b>WO<sub>3</sub>-Sheet-C(1.5%)</b> | 25 min                    | 75 min                   |

### **Reference**

- [1] Naixu Li, et al. Metal nanoparticles supported on WO<sub>3</sub> nanosheets for highly selective hydrogenolysis of cellulose to ethylene glycol. *Green Chemistry*. 2016.
- [2] Fu, L., et al., Photocatalytic hydrogenation of nitrobenzene to aniline over tungsten oxide-silver nanowires. *Materials Letters*, 2015. 142: p. 201-203.
